# Supplementary material for: Wet chemistry route for the decoration of carbon nanotubes with iron oxide nanoparticles for gas sensing
Source: publisher site journal article supplement (doi:10.3762/bjnano.10.10), 2019-01-09
Supplement: Additional file 1 [file 2190-4286-10-10-S1.pdf]

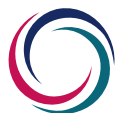

## Supporting Information

for

### **Wet chemistry route for the decoration of carbon nanotubes with iron oxide nanoparticles for gas sensing**

Hussam M. Elnabawy, Juan Casanova-Chafer, Badawi Anis, Mostafa Fedawy, Mattia Scardamaglia, Carla Bittencourt, Ahmed S. G. Khalil, Eduard Llobet and Xavier Vilanova

*Beilstein J. Nanotechnol.* **2019**, *10*, 105–118. [doi:10.3762/bjnano.10.10](https://doi.org/10.3762/bjnano.10.10)

### **Effect of deposition technique on decorated carbon nanotube morphology**

As mentioned in the experimental part of the work, there were two methods for deposition of CNTs layer. The first approach, using drop by drop technique, lead to a non-homogeneous thick layer, while the second approach, using air-brushing technique, lead to a more homogeneous thin layer. The different morphologies obtained for both approaches can be seen in Figure S1.

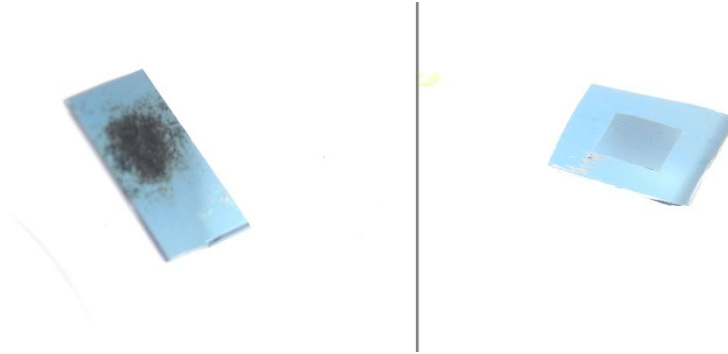

**Figure S1:** CNTs layer deposited with different morphology; thick layer resulting from first approach (a) and thin layer resulting from second approach (b).
