# Supplementary material for: Wet chemistry route for the decoration of carbon nanotubes with iron oxide nanoparticles for gas sensing
Source: publisher site journal article supplement (doi:10.3762/bjnano.10.10), 2019-01-09
Supplement: Additional file 2 [file 2190-4286-10-10-S2.pdf]

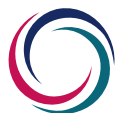

## Supporting Information

for

### **Wet chemistry route for the decoration of carbon nanotubes with iron oxide nanoparticles for gas sensing**

Hussam M. Elnabawy, Juan Casanova-Chafer, Badawi Anis, Mostafa Fedawy, Mattia Scardamaglia, Carla Bittencourt, Ahmed S. G. Khalil, Eduard Llobet and Xavier Vilanova

*Beilstein J. Nanotechnol.* **2019**, *10*, 105–118. [doi:10.3762/bjnano.10.10](https://doi.org/10.3762/bjnano.10.10)

### **Wire bonded sensor**

As mentioned in experimental part of the work, sensors were fabricated by depositing a layer of decorated carbon nanotubes on a small rectangular piece of oxidized silicon, heaters were attached to the back side of the silicon substrate then connections between BCP and both heater and active layer decorated carbon nanotubes were made using platinum wires. Both top and bottom views for the sensors are shown in Figure S2.

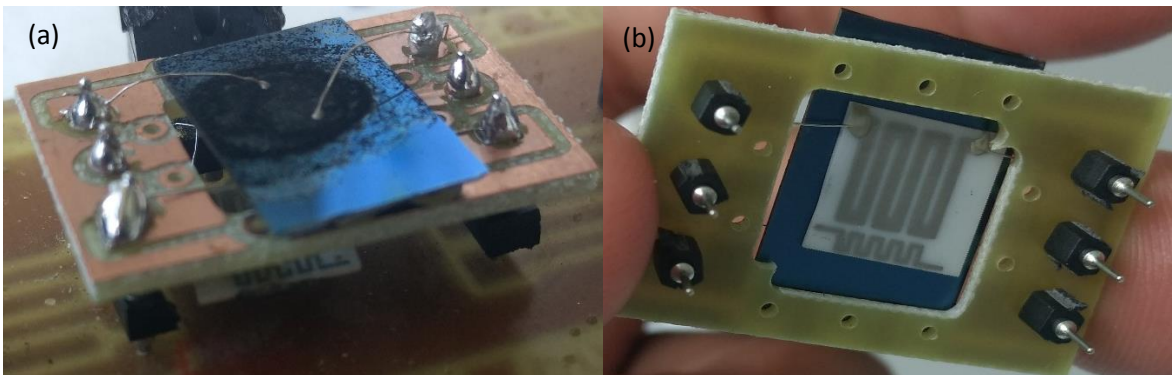

**Figure S2:** (a) Top and (b) bottom views of the fabricated sensor.
