# Supplementary material for: Wet chemistry route for the decoration of carbon nanotubes with iron oxide nanoparticles for gas sensing
Source: publisher site journal article supplement (doi:10.3762/bjnano.10.10), 2019-01-09
Supplement: Additional file 3 [file 2190-4286-10-10-S3.pdf]

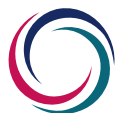

## Supporting Information

for

### **Wet chemistry route for the decoration of carbon nanotubes with iron oxide nanoparticles for gas sensing**

Hussam M. Elnabawy, Juan Casanova-Chafer, Badawi Anis, Mostafa Fedawy, Mattia Scardamaglia, Carla Bittencourt, Ahmed S. G. Khalil, Eduard Llobet and Xavier Vilanova

*Beilstein J. Nanotechnol.* **2019**, *10*, 105–118. [doi:10.3762/bjnano.10.10](https://doi.org/10.3762/bjnano.10.10)

### **Teflon gas sensing chamber allowing for 4 different sensors together for gas sensing**

As mentioned in experimental part of the work, a Teflon chamber which allows the allocation of 4 sensors together, shown in Figure S3, was used for characterization of the fabricated gas sensor.

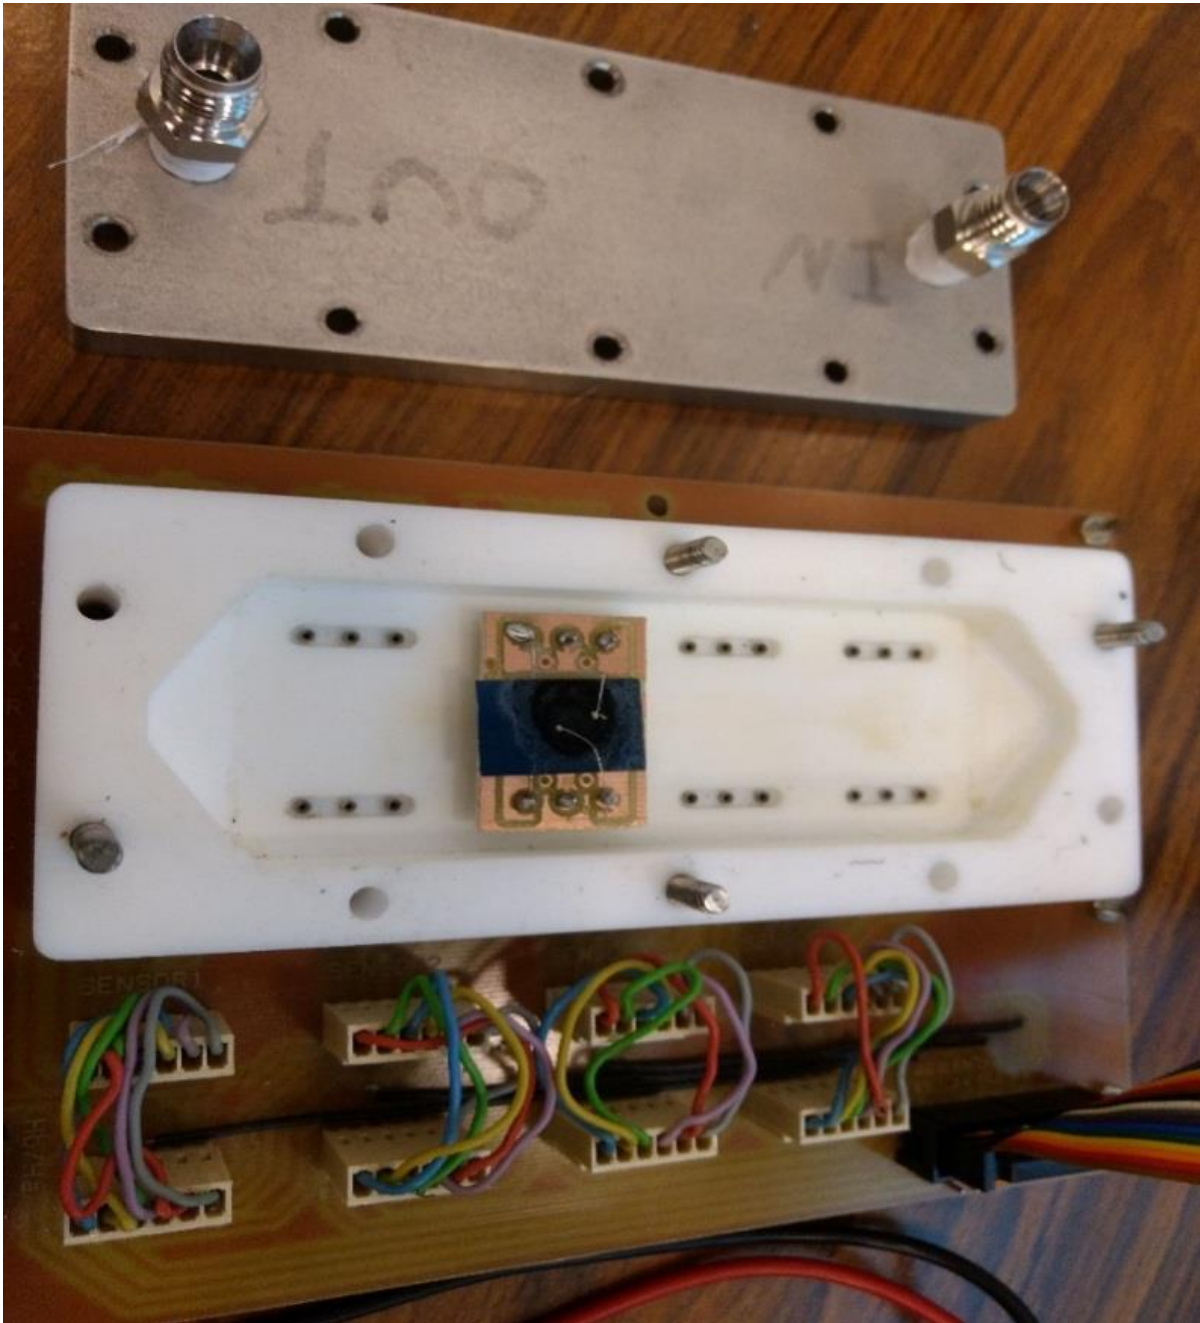

**Figure S3:** Teflon chamber used in characterization of gas sensors can take up to 4 sensors.
