# Supplementary material for: Wet chemistry route for the decoration of carbon nanotubes with iron oxide nanoparticles for gas sensing
Source: publisher site journal article supplement (doi:10.3762/bjnano.10.10), 2019-01-09
Supplement: Additional file 4 [file 2190-4286-10-10-S4.pdf]

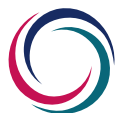

## Supporting Information

for

### **Wet chemistry route for the decoration of carbon nanotubes with iron oxide nanoparticles for gas sensing**

Hussam M. Elnabawy, Juan Casanova-Chafer, Badawi Anis, Mostafa Fedawy, Mattia Scardamaglia, Carla Bittencourt, Ahmed S. G. Khalil, Eduard Llobet and Xavier Vilanova

*Beilstein J. Nanotechnol.* **2019**, *10*, 105–118. [doi:10.3762/bjnano.10.10](https://doi.org/10.3762/bjnano.10.10)

### **Effect of first decoration step on carbon nanotube morphology**

As mentioned in experimental part of the work, two approaches were used for decoration of CNTs. The first approach resulted in agglomerates with large size and rock-like appearance, shown in Figure S4. Which couldn't be used because of the size which can't help in the deposition of CNTs layer even after sonication.

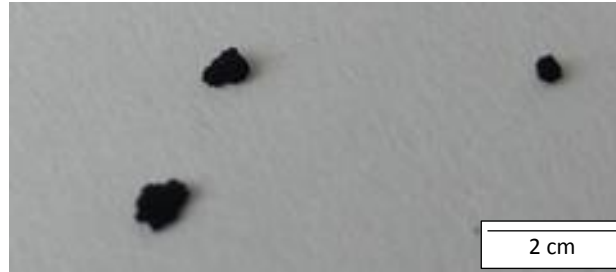

**Figure S4:** Agglomerates of decorated carbon nanotubes resulting from using the first decoration approach.
